# Supplementary material for: Dickkopf 1 impairs the tumor response to PD-1 blockade by inactivating CD8+ T cells in deficient mismatch repair colorectal cancer
Source: HighWire-hosted journal article supplement (doi:10.1136/jitc-2020-001498), 2021-03-01
Supplement: jitc-2020-001498supp015_data_supplement.pdf [file jitc-2020-001498supp015_data_supplement.pdf]

Supplementary Table S6. Predicted E2F1 binding site in the *TBX21* promoter in hTFtarget.

| Motif            | Score   | P value  |
|------------------|---------|----------|
| GGGGTGGGAACGG    | 9.94737 | 4.15E-05 |
| GAGGCGGAGCAG     | 9.53947 | 4.84E-05 |
| CTGCGCGCACCC     | 9.23684 | 7.96E-05 |
| GGGGCGAGGCGG     | 8.15789 | 8.01E-05 |
| GGGGTGGGGCGA     | 15.3289 | 3.35E-06 |
| CGAGAGGGCGGGGTGG | 13.8939 | 8.82E-06 |
| AGGGCGGGGTGG     | 13.4211 | 8.69E-06 |
| CGTTTCCC         | 11.4648 | 1.21E-05 |
