# Supplementary figures and images for: Dickkopf 1 impairs the tumor response to PD-1 blockade by inactivating CD8+ T cells in deficient mismatch repair colorectal cancer
Source: HighWire-hosted journal article supplement (doi:10.1136/jitc-2020-001498), 2021-03-01

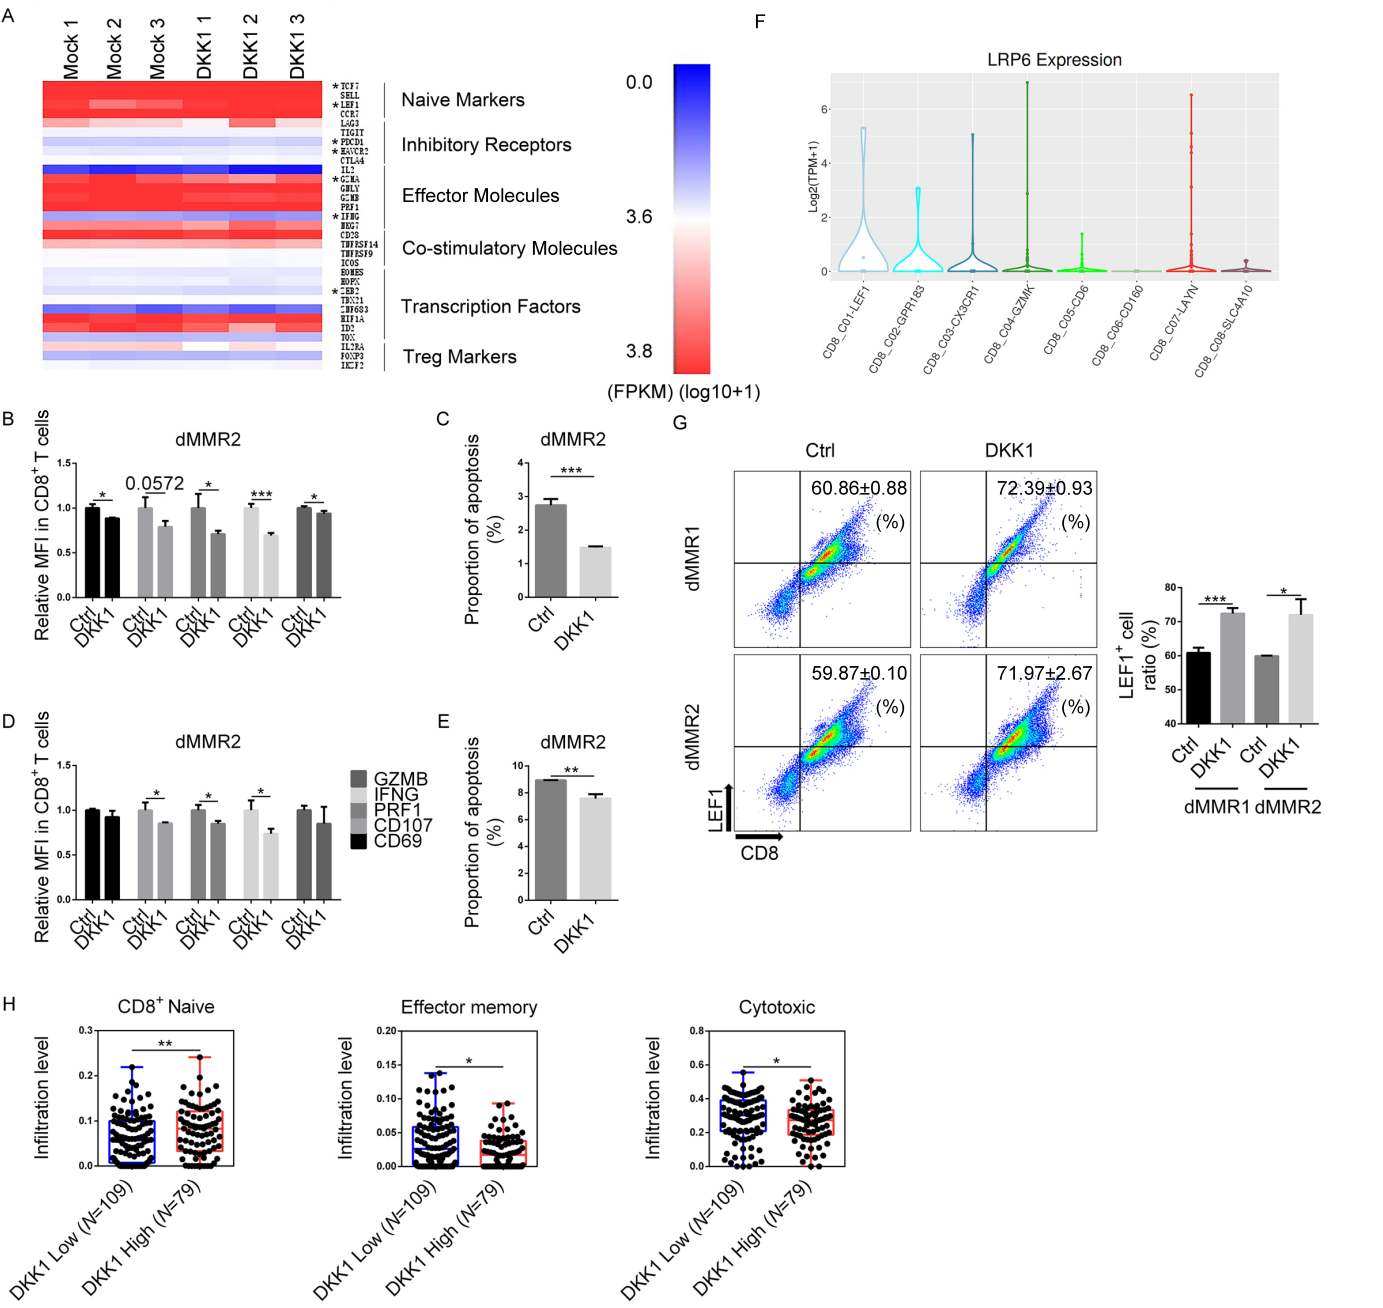

Supplement: jitc-2020-001498supp011_data_supplement.pdf [file jitc-2020-001498supp011_data_supplement.pdf]
